# Supplementary material for: PaleoRiada: A new integrated spatial database of palaeofloods in Spain
Source: Copernicus journal article supplement (doi:10.5194/essd-2024-549), 2025-06-18
Supplement: Supplementary file [file essd-2024-549-CC2-supplement.pdf]

**Q1.**

We thank the reviewer for this comment. Information on river/channel forms has been included in the database within the Hydrological Information Table (HIT), specifically under the field STT (Stream Type), which makes it possible to identify palaeoflood evidence in different geomorphological settings such as torrential mountain streams, wide floodplain rivers, confined streams, and ephemeral Mediterranean streams. We have not incorporated this information into the Basic Information Tables (BIT), since these are intended to present only the fundamental descriptive data of each record.

**Q2.**

We agree with the reviewer that the type of evidence is a key element of palaeoflood studies. This information has been incorporated in the database within the *Record Basic Data table* (fields T, ST and SST). In addition, the article text provides a synthesis of this information (Table 4).

**Q3.**

We greatly appreciate this suggestion and fully agree with the reviewer. Frequency analyses based on the PaleoRiada database will inevitably reflect the same magnitude bias as the original studies from which the data were derived. This limitation is already acknowledged in the manuscript (Section 3.3 Hydrological Data).
